# Supplementary material for: An Empirical Investigation of the Relationship Between Spirituality, Work Culture, and Burnout: The Need for an Extended Health and Disease Model
Source: PubMed Central journal article supplement (PMC8473891; doi:10.3389/fpsyg.2021.723884), 2021-09-13
Supplement: Table_1.pdf [file Table_1.pdf]

**Supplementary Material**
**APPENDIX TABLE A.1 | Multiple Regression Analysis with Burnout as Dependent Variable and Positive Meaning, Meaning Making Through Work, and Greater Good Motivations as Independent Variables.**

| Model | Variables                   | Unstandardized coefficient |           | Standardized coefficient | <i>p</i> | <i>R</i> <sup>2</sup> <sub>adj</sub> | <i>F</i>        |
|-------|-----------------------------|----------------------------|-----------|--------------------------|----------|--------------------------------------|-----------------|
|       |                             | <i>B</i>                   | <i>SE</i> | $\beta$                  |          |                                      |                 |
| 1     | (Constant)                  | 6.18                       | .16       | –                        | .00**    | .48                                  | 134.21 (3; 435) |
|       | Positive meaning            | –.76                       | .09       | –.65                     | .00**    |                                      |                 |
|       | Meaning making through work | –.16                       | .08       | –.14                     | .05*     |                                      |                 |
|       | Greater good motivations    | .12                        | .06       | .10                      | .04*     |                                      |                 |
| 2     | (Constant)                  | 6.63                       | .64       | –                        | .00**    | .48                                  | 18.70 (23; 415) |
|       | Positive meaning            | –.77                       | .10       | –.66                     | .00**    |                                      |                 |
|       | Meaning making through work | –.16                       | .09       | –.14                     | .06      |                                      |                 |
|       | Greater good motivations    | .12                        | .06       | .11                      | .05*     |                                      |                 |

Model 1: First regression, associations between burnout and positive meaning, meaning making through work, and greater good motivations.

Model 2: Second regression, associations after adding the covariates (age, gender, highest level of education, company size, average weekly working hours, and marital status).

\**p* < .05. \*\**p* < 0.01. – statistically significant (two-tailed), results are based on 1000 bootstrap samples.

## Extended Health and Disease Model

**TABLE A.2 | Multiple Regression Analysis with Emotional Exhaustion as Dependent Variable and Positive Meaning, Meaning Making Through Work, and Greater Good Motivations as Independent Variables.**

| Model | Variables                   | Unstandardized coefficient |           | Standardized coefficient | <i>p</i> | <i>R</i> <sup>2</sup> <sub>adj</sub> | <i>F</i>       |
|-------|-----------------------------|----------------------------|-----------|--------------------------|----------|--------------------------------------|----------------|
|       |                             | <i>B</i>                   | <i>SE</i> | $\beta$                  |          |                                      |                |
| 1     | (Constant)                  | 6.56                       | .23       | –                        | .00**    | .22                                  | 41.69 (3; 435) |
|       | Positive meaning            | –.64                       | .14       | –.44                     | .00**    |                                      |                |
|       | Meaning making through work | –.24                       | .12       | –.16                     | .06      |                                      |                |
|       | Greater good motivations    | .22                        | .09       | .16                      | .02*     |                                      |                |
| 2     | (Constant)                  | 8.31                       | 1.28      | –                        | .00**    | .23                                  | 6.53 (23; 415) |
|       | Positive meaning            | –.68                       | .15       | –.46                     | .00**    |                                      |                |
|       | Meaning making through work | –.26                       | .12       | –.18                     | .04*     |                                      |                |
|       | Greater good motivations    | .24                        | .10       | .17                      | .01*     |                                      |                |

Model 1: First regression, associations between emotional exhaustion and positive meaning, meaning making through work, and greater good motivations.

Model 2: Second regression, associations after adding the covariates (age, gender, highest level of education, company size, average weekly working hours, and marital status).

\**p* < .05. \*\**p* < 0.01. – statistically significant (two-tailed), results are based on 1000 bootstrap samples.

## Extended Health and Disease Model

**TABLE A.3 | Multiple Regression Analysis with Cynicism as Dependent Variable and Positive Meaning, Meaning Making Through Work, and Greater Good Motivations as Independent Variables.**

| Model | Variables                   | Unstandardized coefficient |           | Standardized coefficient | <i>p</i> | <i>R</i> <sup>2</sup> <sub>adj</sub> | <i>F</i>        |
|-------|-----------------------------|----------------------------|-----------|--------------------------|----------|--------------------------------------|-----------------|
|       |                             | <i>B</i>                   | <i>SE</i> | $\beta$                  |          |                                      |                 |
| 1     | (Constant)                  | 7.60                       | .23       | –                        | .00**    | .50                                  | 146.48 (3; 435) |
|       | Positive meaning            | –1.27                      | .12       | –.74                     | .00**    |                                      |                 |
|       | Meaning making through work | –.05                       | .12       | –.03                     | .68      |                                      |                 |
|       | Greater good motivations    | .13                        | .08       | .08                      | .11      |                                      |                 |
| 2     | (Constant)                  | 7.63                       | .72       | –                        | .00**    | .50                                  | 20.26 (23; 415) |
|       | Positive meaning            | –1.23                      | .12       | –.72                     | .00**    |                                      |                 |
|       | Meaning making through work | –.06                       | .12       | –.03                     | .61      |                                      |                 |
|       | Greater good motivations    | .11                        | .08       | .07                      | .19      |                                      |                 |

Model 1: First regression, associations between cynicism and positive meaning, meaning making through work, and greater good motivations.

Model 2: Second regression, associations after adding the covariates (age, gender, highest level of education, company size, average weekly working hours, and marital status).

\**p* < .05. \*\**p* < 0.01. – statistically significant (two-tailed), results are based on 1000 bootstrap samples.

## Extended Health and Disease Model

**TABLE A.4 | Multiple Regression Analysis with Reduced Professional Efficacy as Dependent Variable and Positive Meaning, Meaning Making Through Work, and Greater Good Motivations as Independent Variables.**

| Model | Variables                   | Unstandardized coefficient |           | Standardized coefficient | <i>p</i> | <i>R</i> <sup>2</sup> <sub>adj</sub> | <i>F</i>       |
|-------|-----------------------------|----------------------------|-----------|--------------------------|----------|--------------------------------------|----------------|
|       |                             | <i>B</i>                   | <i>SE</i> | $\beta$                  |          |                                      |                |
| 1     | (Constant)                  | 4.36                       | .18       | –                        | .00**    | .29                                  | 60.90 (3; 435) |
|       | Positive meaning            | –.37                       | .09       | –.37                     | .00**    |                                      |                |
|       | Meaning making through work | –.19                       | .08       | –.19                     | .01*     |                                      |                |
|       | Greater good motivations    | –.00                       | .06       | –.01                     | .94      |                                      |                |
| 2     | (Constant)                  | 3.96                       | .30       | –                        | .00**    | .30                                  | 9.26 (23; 415) |
|       | Positive meaning            | –.41                       | .09       | –.41                     | .00**    |                                      |                |
|       | Meaning making through work | –.17                       | .08       | –.17                     | .03*     |                                      |                |
|       | Greater good motivations    | .01                        | .06       | .02                      | .82      |                                      |                |

Model 1: First regression, associations between reduced professional efficacy and positive meaning, meaning making through work, and greater good motivations.

Model 2: Second regression, associations after adding the covariates (age, gender, highest level of education, company size, average weekly working hours, and marital status).

\**p* < .05. \*\**p* < 0.01. – statistically significant (two-tailed), results are based on 1000 bootstrap samples.

## Extended Health and Disease Model

**TABLE A.5 | Multiple Regression Analysis with Work Engagement as Dependent Variable and Positive Meaning, Meaning Making Through Work, and Greater Good Motivations as Independent Variables.**

| Model | Variables                   | Unstandardized coefficient |           | Standardized coefficient | <i>p</i> | <i>R</i> <sup>2</sup> <sub>adj</sub> | <i>F</i>        |
|-------|-----------------------------|----------------------------|-----------|--------------------------|----------|--------------------------------------|-----------------|
|       |                             | <i>B</i>                   | <i>SE</i> | $\beta$                  |          |                                      |                 |
| 1     | (Constant)                  | 1.65                       | .16       | –                        | .00**    | .50                                  | 146.09 (3; 435) |
|       | Positive meaning            | .73                        | .09       | .62                      | .00**    |                                      |                 |
|       | Meaning making through work | .25                        | .08       | .21                      | .00**    |                                      |                 |
|       | Greater good motivations    | –.15                       | .06       | –.14                     | .01*     |                                      |                 |
| 2     | (Constant)                  | 1.97                       | .46       | –                        | .00**    | .51                                  | 20.64 (23; 415) |
|       | Positive meaning            | .73                        | .10       | .62                      | .00**    |                                      |                 |
|       | Meaning making through work | .25                        | .09       | .21                      | .01**    |                                      |                 |
|       | Greater good motivations    | –.15                       | .06       | –.13                     | .01*     |                                      |                 |

Model 1: First regression, associations between work engagement and positive meaning, meaning making through work, and greater good motivations.

Model 2: Second regression, associations after adding the covariates (age, gender, highest level of education, company size, average weekly working hours, and marital status).

\**p* < .05. \*\**p* < 0.01. – statistically significant (two-tailed), results are based on 1000 bootstrap samples.

## Extended Health and Disease Model

**TABLE A.6 | Multiple Regression Analysis with Burnout as Dependent Variable and Needs Fulfillment, Group Membership, Influence, and Emotional Connection as Independent Variables.**

| Model | Variables            | Unstandardized coefficient |           | Standardized coefficient | <i>p</i> | <i>R</i> <sup>2</sup> <sub>adj</sub> | <i>F</i>        |
|-------|----------------------|----------------------------|-----------|--------------------------|----------|--------------------------------------|-----------------|
|       |                      | <i>B</i>                   | <i>SE</i> | $\beta$                  |          |                                      |                 |
| 1     | (Constant)           | 6.40                       | .21       | –                        | .00**    | .50                                  | 111.14 (4; 434) |
|       | Needs fulfillment    | –.35                       | .06       | –.34                     | .00**    |                                      |                 |
|       | Group membership     | –.23                       | .07       | –.23                     | .00**    |                                      |                 |
|       | Influence            | –.02                       | .05       | –.02                     | .67      |                                      |                 |
|       | Emotional connection | –.25                       | .08       | –.20                     | .00**    |                                      |                 |
| 2     | (Constant)           | 6.91                       | .69       | –                        | .00**    | .51                                  | 19.62 (4; 414)  |
|       | Needs fulfillment    | –.36                       | .06       | –.34                     | .00**    |                                      |                 |
|       | Group membership     | –.24                       | .07       | –.24                     | .00**    |                                      |                 |
|       | Influence            | –.01                       | .06       | –.01                     | .83      |                                      |                 |
|       | Emotional connection | –.23                       | .09       | –.19                     | .00**    |                                      |                 |

Model 1: First regression, associations between burnout and needs fulfillment, group membership, influence, and emotional connection.

Model 2: Second regression, associations after adding the covariates (age, gender, highest level of education, company size, average weekly working hours, and marital status).

\**p* < .05. \*\**p* < 0.01. – statistically significant (two-tailed), results are based on 1000 bootstrap samples.

## Extended Health and Disease Model

**TABLE A.7 | Multiple Regression Analysis with Emotional Exhaustion as Dependent Variable and Needs Fulfillment, Group Membership, Influence, and Emotional Connection as Independent Variables.**

| Model | Variables            | Unstandardized coefficient |           | Standardized coefficient | <i>p</i> | <i>R</i> <sup>2</sup> <sub>adj</sub> | <i>F</i>       |
|-------|----------------------|----------------------------|-----------|--------------------------|----------|--------------------------------------|----------------|
|       |                      | <i>B</i>                   | <i>SE</i> | $\beta$                  |          |                                      |                |
| 1     | (Constant)           | 7.00                       | .27       | –                        | .00**    | .30                                  | 47.53 (4; 434) |
|       | Needs fulfillment    | –.52                       | .09       | –.39                     | .00**    |                                      |                |
|       | Group membership     | –.12                       | .09       | –.09                     | .19      |                                      |                |
|       | Influence            | .08                        | .07       | .05                      | .28      |                                      |                |
|       | Emotional connection | –.23                       | .11       | –.15                     | .04*     |                                      |                |
| 2     | (Constant)           | 8.76                       | 1.10      | –                        | .00**    | .30                                  | 8.73 (24; 414) |
|       | Needs fulfillment    | –.50                       | .09       | –.38                     | .00**    |                                      |                |
|       | Group membership     | –.17                       | .10       | –.13                     | .08      |                                      |                |
|       | Influence            | .08                        | .08       | .06                      | .34      |                                      |                |
|       | Emotional connection | –.22                       | .12       | –.14                     | .06      |                                      |                |

Model 1: First regression, associations between emotional exhaustion and needs fulfillment, group membership, influence, and emotional connection.

Model 2: Second regression, associations after adding the covariates (age, gender, highest level of education, company size, average weekly working hours, and marital status).

\**p* < .05. \*\**p* < 0.01. – statistically significant (two-tailed), results are based on 1000 bootstrap samples.

## Extended Health and Disease Model

**TABLE A.8 | Multiple Regression Analysis with Cynicism as Dependent Variable and Needs Fulfillment, Group Membership, Influence, and Emotional Connection as Independent Variables.**

| Model | Variables            | Unstandardized coefficient |           | Standardized coefficient | <i>p</i> | <i>R</i> <sup>2</sup> <sub>adj</sub> | <i>F</i>        |
|-------|----------------------|----------------------------|-----------|--------------------------|----------|--------------------------------------|-----------------|
|       |                      | <i>B</i>                   | <i>SE</i> | $\beta$                  |          |                                      |                 |
| 1     | (Constant)           | 7.69                       | .30       | –                        | .00**    | .47                                  | 97.84 (4; 434)  |
|       | Needs fulfillment    | –.46                       | .10       | –.30                     | .00**    |                                      |                 |
|       | Group membership     | –.40                       | .12       | –.26                     | .00**    |                                      |                 |
|       | Influence            | .01                        | .08       | .01                      | .88      |                                      |                 |
|       | Emotional connection | –.37                       | .13       | –.20                     | .00**    |                                      |                 |
| 2     | (Constant)           | 7.78                       | .68       | –                        | .00**    | .48                                  | 18.04 (24; 414) |
|       | Needs fulfillment    | –.50                       | .11       | –.32                     | .00**    |                                      |                 |
|       | Group membership     | –.37                       | .12       | –.24                     | .00**    |                                      |                 |
|       | Influence            | .04                        | .09       | .02                      | .69      |                                      |                 |
|       | Emotional connection | –.33                       | .13       | –.18                     | .02*     |                                      |                 |

Model 1: First regression, associations between cynicism and needs fulfillment, group membership, influence, and emotional connection.

Model 2: Second regression, associations after adding the covariates (age, gender, highest level of education, company size, average weekly working hours, and marital status).

\**p* < .05. \*\**p* < 0.01. – statistically significant (two-tailed), results are based on 1000 bootstrap samples.



## Extended Health and Disease Model

**TABLE A.9 | Multiple Regression Analysis with Reduced Professional Efficacy as Dependent Variable and Needs Fulfillment, Group Membership, Influence, and Emotional Connection as Independent Variables.**

| Model | Variables            | Unstandardized coefficient |           | Standardized coefficient | <i>p</i> | <i>R</i> <sup>2</sup> <sub>adj</sub> | <i>F</i>       |
|-------|----------------------|----------------------------|-----------|--------------------------|----------|--------------------------------------|----------------|
|       |                      | <i>B</i>                   | <i>SE</i> | $\beta$                  |          |                                      |                |
| 1     | (Constant)           | 4.50                       | .20       | –                        | .00**    | .28                                  | 44.18 (4; 434) |
|       | Needs fulfillment    | –.09                       | .06       | –.10                     | .13      |                                      |                |
|       | Group membership     | –.19                       | .06       | –.21                     | .00**    |                                      |                |
|       | Influence            | –.16                       | .05       | –.16                     | .00**    |                                      |                |
|       | Emotional connection | –.16                       | .08       | –.15                     | .04*     |                                      |                |
| 2     | (Constant)           | 4.20                       | .40       | –                        | .00**    | .29                                  | 8.52 (24; 414) |
|       | Needs fulfillment    | –.08                       | .06       | –.09                     | .24      |                                      |                |
|       | Group membership     | –.20                       | .07       | –.22                     | .00**    |                                      |                |
|       | Influence            | –.16                       | .05       | –.17                     | .00**    |                                      |                |
|       | Emotional connection | –.15                       | .09       | –.14                     | .09      |                                      |                |

Model 1: First regression, associations between reduced professional efficacy and needs fulfillment, group membership, influence, and emotional connection.

Model 2: Second regression, associations after adding the covariates.

\**p* < .05. \*\**p* < 0.01. – statistically significant (two-tailed), results are based on 1000 bootstrap samples.

## Extended Health and Disease Model

**TABLE A.10 | Multiple Regression Analysis with Work Engagement as Dependent Variable and Needs Fulfillment, Group Membership, Influence, and Emotional Connection as Independent Variables.**

| Model | Variables            | Unstandardized coefficient |           | Standardized coefficient | <i>p</i> | <i>R</i> <sup>2</sup> <sub>adj</sub> | <i>F</i>        |
|-------|----------------------|----------------------------|-----------|--------------------------|----------|--------------------------------------|-----------------|
|       |                      | <i>B</i>                   | <i>SE</i> | $\beta$                  |          |                                      |                 |
| 1     | (Constant)           | 1.35                       | .21       | –                        | .00**    | .48                                  | 100.33 (4; 434) |
|       | Needs fulfillment    | .17                        | .06       | .16                      | .00**    |                                      |                 |
|       | Group membership     | .20                        | .07       | .19                      | .00**    |                                      |                 |
|       | Influence            | .07                        | .05       | .06                      | .20      |                                      |                 |
|       | Emotional connection | .45                        | .08       | .36                      | .00**    |                                      |                 |
| 2     | (Constant)           | 1.60                       | .54       | –                        | .00**    | .50                                  | 18.86 (24; 414) |
|       | Needs fulfillment    | .22                        | .06       | .21                      | .00**    |                                      |                 |
|       | Group membership     | .16                        | .07       | .15                      | .04*     |                                      |                 |
|       | Influence            | .08                        | .06       | .07                      | .15      |                                      |                 |
|       | Emotional connection | .41                        | .08       | .33                      | .00**    |                                      |                 |

Model 1: First regression, associations between work engagement and needs fulfillment, group membership, influence, and emotional connection.

Model 2: Second regression, associations after adding the covariates (age, gender, highest level of education, company size, average weekly working hours, and marital status).

\**p* < .05. \*\**p* < 0.01. – statistically significant (two-tailed), results are based on 1000 bootstrap samples.
